# Supplementary material
Source: MDPI journal article supplement (https://www.mdpi.com/1424-2818/13/1/32)
Supplement: s1 [file s1]

**Table S1.** Diet composition of males and females in *Lissotriton italicus*, *Lissotriton vulgaris* and

*Triturus carnifex*. The number of stomachs examined is reported in brackets (females; males). N% = percentage of prey number; V% = percentage of prey volume; IRI = index of relative importance; B' = Hurlbert Index values; ad = adult; l = larvae; ne = neanids; ny = nymphs; pu = pupae; aq = aquatic; ter = terrestrial.

| PREY                        | <i>L. italicus</i> (83; 59) |      |       |      |      |       | <i>L. vulgaris</i> (70; 93) |      |       |      |      |       | <i>T. carnifex</i> (111; 116) |       |       |      |       |       |
|-----------------------------|-----------------------------|------|-------|------|------|-------|-----------------------------|------|-------|------|------|-------|-------------------------------|-------|-------|------|-------|-------|
|                             | N% F                        | V% F | IRI F | N% M | V% M | IRI M | N% F                        | V% F | IRI F | N% M | V% M | IRI M | N% F                          | V% F  | IRI F | N% M | V% M  | IRI M |
| Acanthocephala              | 0                           | 0    | 0     | 0    | 0    | 0     | 0                           | 0    | 0     | 0    | 0    | 0     | 0.0                           |       | 0.03  |      |       |       |
|                             |                             |      |       | 0.33 | 0.00 | 1.14  |                             |      |       | 0.1  | 0.00 | 0.11  | 41                            | 0.002 | 9     | 0    | 0     | 0     |
| Acarina                     | 0                           | 0    | 0     | 5    | 2    | 2     | 0                           | 0    | 0     | 03   | 4    | 5     | 24                            | 0.002 | 9     | 0    | 0     | 0     |
|                             | 7.0                         | 0.08 | 154.  | 8.37 | 0.32 | 324.  | 1.3                         | 0.16 | 29.4  | 2.6  | 0.25 | 62.3  | 3.3                           |       | 59.2  | 1.5  |       | 18.5  |
| Amphipoda                   | 38                          | 1    | 391   | 5    | 6    | 435   | 10                          | 4    | 72    | 49   | 2    | 72    | 79                            | 0.085 | 94    | 13   | 0.026 | 65    |
|                             | 0.6                         | 1.12 | 12.7  | 0.67 | 2.20 | 19.4  | 0.0                         | 0.36 | 0.58  | 0.0  | 0.50 | 0.58  | 0.4                           |       | 10.6  | 0.3  |       | 8.11  |
| Araneae                     | 30                          | 7    | 01    | 0    | 5    | 90    | 47                          | 6    | 9     | 34   | 5    | 0     | 12                            | 1.067 | 63    | 09   | 0.867 | 1     |
|                             | 1.6                         | 2.56 | 10.2  |      |      |       | 0.1                         | 0.93 | 3.07  |      |      |       | 0.1                           |       | 0.93  | 2.2  |       | 44.1  |
| Bivalvia                    | 81                          | 2    | 23    | 0    | 0    | 0     | 40                          | 5    | 4     | 0    | 0    | 0     | 65                            | 0.354 | 4     | 69   | 5.042 | 20    |
|                             | 0.1                         | 0.94 | 1.27  | 0.16 | 2.78 | 5.00  |                             |      |       |      |      |       | 0.0                           |       | 0.52  | 0.2  |       | 15.8  |
| Blattodea                   | 05                          | 9    | 0     | 8    | 5    | 5     | 0                           | 0    | 0     | 0    | 0    | 0     | 41                            | 0.546 | 9     | 06   | 2.857 | 44    |
|                             | 27.                         | 1.32 | 724.  | 21.1 | 1.89 | 935.  | 78.                         | 16.8 | 6966  | 73.  | 29.6 | 7132  | 56.                           |       | 2078  | 46.  |       | 1646  |
| Cladocera                   | 311                         | 2    | 435   | 06   | 4    | 592   | 812                         | 07   | .545  | 994  | 44   | .059  | 819                           | 3.888 | .265  | 889  | 3.361 | .126  |
|                             | 0.1                         | 0.14 | 0.30  | 0.33 | 0.85 | 4.01  |                             |      |       | 0.0  | 0.48 | 1.19  | 0.1                           |       | 1.14  | 0.0  |       | 0.35  |
| Coleoptera ad aq            | 05                          | 5    | 1     | 5    | 1    | 9     | 0                           | 0    | 0     | 69   | 8    | 8     | 24                            | 0.300 | 4     | 69   | 0.139 | 9     |
| Coleoptera ad ter           | 1.5                         | 1.70 | 35.5  | 1.67 | 4.76 | 87.2  | 0.2                         | 1.60 | 13.1  | 0.1  | 0.83 | 1.00  | 2.0                           |       | 120.  | 1.1  |       | 91.7  |
|                             | 76                          | 1    | 33    | 5    | 3    | 90    | 34                          | 8    | 56    | 03   | 4    | 8     | 60                            | 4.332 | 928   | 69   | 5.929 | 87    |
| Coleoptera l aq             | 1.3                         | 1.17 | 27.5  | 0.67 | 0.63 | 6.64  | 0.0                         | 0.10 | 0.21  |      |      |       | 0.5                           |       | 3.33  | 0.1  |       | 0.83  |
|                             | 66                          | 3    | 25    | 0    | 7    | 6     | 47                          | 6    | 8     | 0    | 0    | 0     | 36                            | 0.389 | 3     | 38   | 0.104 | 4     |
|                             |                             |      |       |      |      |       |                             |      |       |      |      |       | 0.0                           |       | 0.22  | 0.2  |       | 0.94  |
| Coleoptera l ter            | 0                           | 0    | 0     | 0    | 0    | 0     | 0                           | 0    | 0     | 0    | 0    | 0     | 82                            | 0.164 | 2     | 41   | 0.124 | 2     |
|                             | 0.5                         | 0.00 | 1.27  |      |      |       | 0.0                         | 0.00 | 0.06  |      |      |       | 0.0                           |       | 0.15  |      |       |       |
| Collembola                  | 25                          | 5    | 7     | 0    | 0    | 0     | 47                          | 2    | 9     | 0    | 0    | 0     | 82                            | 0.001 | 0     | 0    | 0     | 0     |
|                             | 0.1                         | 0.10 | 0.25  | 0.33 | 0.32 | 2.24  |                             |      |       |      |      |       | 0.1                           |       | 0.22  |      |       |       |
| Crustacea                   | 05                          | 9    | 8     | 5    | 6    | 2     | 0                           | 0    | 0     | 0    | 0    | 0     | 24                            | 0.003 | 8     | 0    | 0     | 0     |
|                             | 0.1                         | 0.88 | 1.18  |      |      |       |                             |      |       |      |      |       |                               |       |       |      |       |       |
| Dermaptera                  | 05                          | 1    | 8     | 0    | 0    | 0     | 0                           | 0    | 0     | 0    | 0    | 0     | 0                             | 0     | 0     | 0    | 0     | 0     |
|                             |                             |      |       |      |      |       |                             |      |       |      |      |       | 0.3                           |       | 15.6  | 0.0  |       | 0.75  |
| Diplopoda                   | 0                           | 0    | 0     | 0    | 0    | 0     | 0                           | 0    | 0     | 0    | 0    | 0     | 71                            | 3.107 | 68    | 69   | 0.811 | 8     |
|                             | 2.6                         | 0.61 | 46.8  | 2.01 | 0.69 | 36.6  |                             |      |       | 0.0  | 0.12 | 0.42  | 0.5                           |       | 5.71  | 0.4  |       | 6.07  |
| Diptera                     | 26                          | 4    | 37    | 01   | 3    | 47    | 0                           | 0    | 0     | 69   | 7    | 1     | 36                            | 0.169 | 6     | 81   | 0.159 | 1     |
|                             | 24.                         | 7.13 | 1659  | 32.9 | 13.5 | 3233  | 6.2                         | 11.6 | 1022  | 8.8  | 28.3 | 2080  | 9.9                           | 14.21 | 1218  | 21.  | 15.56 | 2554  |
| Diptera l                   | 895                         | 3    | .300  | 983  | 37   | .842  | 68                          | 28   | .630  | 75   | 35   | .548  | 30                            | 8     | .295  | 485  | 1     | .867  |
|                             | 4.7                         | 8.30 | 376.  | 8.20 | 26.5 | 1355  | 2.5                         | 19.4 | 595.  | 0.6  | 9.93 | 159.  | 4.1                           | 10.14 | 527.  | 8.3  | 21.30 | 1022  |
| Diptera pu                  | 27                          | 9    | 950   | 77   | 59   | .300  | 26                          | 17   | 595   | 88   | 6    | 935   | 20                            | 9     | 061   | 53   | 1     | .558  |
|                             | 2.3                         | 1.96 | 56.7  | 0.83 | 1.31 | 14.5  | 0.2                         | 1.04 | 11.3  | 0.1  | 0.72 | 2.66  | 0.7                           |       | 18.0  | 0.7  |       | 20.5  |
| Ephemeroptera l             | 11                          | 7    | 00    | 75   | 2    | 76    | 81                          | 5    | 61    | 03   | 2    | 1     | 00                            | 0.839 | 32    | 56   | 0.946 | 50    |
|                             | 1.1                         | 0.14 | 10.9  | 1.67 | 0.21 | 16.0  |                             |      |       | 0.0  | 0.04 | 0.08  | 0.8                           |       | 12.1  | 0.6  |       | 7.69  |
| Formicidae                  | 55                          | 1    | 31    | 50   | 5    | 16    | 0                           | 0    | 0     | 34   | 7    | 7     | 65                            | 0.173 | 63    | 53   | 0.158 | 6     |
|                             |                             |      |       | 0.16 | 1.28 | 2.46  | 0.3                         | 6.81 | 61.6  | 0.0  | 1.17 | 1.30  | 3.0                           | 17.77 | 337.  | 1.5  |       | 180.  |
| Gastropoda                  | 0                           | 0    | 0     | 75   | 4    | 0     | 74                          | 4    | 15    | 34   | 7    | 2     | 08                            | 7     | 056   | 47   | 9.469 | 439   |
|                             | 0.1                         | 6.77 | 8.28  |      |      |       | 0.0                         | 13.1 | 18.9  |      |      |       |                               |       |       | 0.1  | 13.03 | 22.7  |
| Haplotaxida                 | 05                          | 1    | 5     | 0    | 0    | 0     | 47                          | 86   | 04    | 0    | 0    | 0     | 0                             | 0     | 0     | 38   | 0     | 03    |
| Hymenoptera (no Formicidae) | 0.3                         | 1.64 | 4.71  | 0.83 | 0.21 | 8.91  | 0.0                         | 0.03 | 0.11  |      |      |       | 0.1                           |       | 0.98  | 0.1  |       | 3.21  |
|                             | 15                          | 1    | 4     | 75   | 5    | 6     | 47                          | 1    | 2     | 0    | 0    | 0     | 24                            | 0.241 | 5     | 38   | 0.794 | 1     |
|                             | 6.7                         | 54.8 | 964.  | 2.51 | 37.7 | 341.  | 0.1                         | 6.67 | 29.4  | 0.2  | 18.4 | 120.  | 1.6                           | 17.65 | 86.7  | 0.6  |       | 49.0  |
| Isopoda aq                  | 23                          | 68   | 679   | 3    | 48   | 190   | 87                          | 8    | 22    | 75   | 53   | 829   | 07                            | 4     | 62    | 53   | 7.474 | 41    |

|                    |     |      |      |      |      |      |     |      |      |     |      |      |     |       |      |     |       |      |
|--------------------|-----|------|------|------|------|------|-----|------|------|-----|------|------|-----|-------|------|-----|-------|------|
|                    |     |      |      |      |      |      |     |      |      |     |      |      | 0.0 |       | 0.42 | 0.0 |       | 0.12 |
| Isopoda ter        | 0   | 0    | 0    | 0    | 0    | 0    | 0   | 0    | 0    | 0   | 0    | 0    | 82  | 0.152 | 2    | 34  | 0.107 | 2    |
|                    |     |      |      | 0.16 | 0.17 | 0.57 | 0.0 | 0.11 | 0.22 |     |      |      |     |       |      |     |       |      |
| Isoptera           | 0   | 0    | 0    | 75   | 4    | 8    | 47  | 2    | 7    | 0   | 0    | 0    | 0   | 0     | 0    | 0   | 0     | 0    |
|                    |     |      |      |      |      |      | 0.0 | 0.62 | 0.95 |     |      |      | 0.1 |       | 3.87 | 0.2 |       | 8.60 |
| Lepidoptera l      | 0   | 0    | 0    | 0    | 0    | 0    | 47  | 1    | 5    | 0   | 0    | 0    | 24  | 1.309 | 3    | 06  | 1.457 | 1    |
|                    |     |      |      | 0.16 | 0.00 | 0.28 |     |      |      |     |      |      |     |       |      |     |       |      |
| Nematoda           | 0   | 0    | 0    | 75   | 1    | 5    | 0   | 0    | 0    | 0   | 0    | 0    | 0   | 0     | 0    | 0   | 0     | 0    |
|                    |     |      |      |      |      |      |     |      |      |     |      |      | 0.0 |       | 2.33 | 0.0 |       | 0.79 |
| Odonata            | 0   | 0    | 0    | 0    | 0    | 0    | 0   | 0    | 0    | 0   | 0    | 0    | 82  | 1.212 | 2    | 34  | 0.889 | 6    |
|                    | 0.5 | 1.42 | 9.37 | 0.83 | 1.55 | 16.2 | 0.1 | 12.5 | 54.1 |     |      |      | 0.6 | 10.99 | 135. | 0.2 |       | 13.2 |
| Odonata l          | 25  | 1    | 9    | 8    | 8    | 39   | 40  | 01   | 79   | 0   | 0    | 0    | 18  | 1     | 965  | 41  | 2.314 | 15   |
|                    | 0.4 | 0.50 | 2.23 | 0.16 | 0.37 | 0.91 |     |      |      |     |      |      | 0.0 |       | 0.10 | 0.0 |       | 0.08 |
| Orthoptera         | 20  | 7    | 5    | 75   | 2    | 5    | 0   | 0    | 0    | 0   | 0    | 0    | 41  | 0.070 | 0    | 34  | 0.061 | 2    |
|                    | 6.7 | 0.54 | 183. | 14.5 | 2.17 | 709. | 7.7 | 2.74 | 465. | 12. | 8.41 | 953. | 7.7 |       | 201. | 10. |       | 369. |
| Ostracoda          | 23  | 4    | 850  | 73   | 0    | 433  | 64  | 7    | 477  | 693 | 2    | 169  | 05  | 0.877 | 022  | 072 | 1.198 | 184  |
| Pseudoscorpioni da | 0.2 | 0.01 | 0.27 |      |      |      |     |      |      |     |      |      |     |       |      |     |       |      |
|                    | 10  | 4    | 0    | 0    | 0    | 0    | 0   | 0    | 0    | 0   | 0    | 0    | 0   | 0     | 0    | 0   | 0     | 0    |
|                    | 0.1 | 0.04 | 0.18 |      |      |      |     |      |      |     |      |      | 0.0 |       | 0.03 | 0.0 |       | 1.18 |
| Rhynchota ad aq    | 05  | 8    | 4    | 0    | 0    | 0    | 0   | 0    | 0    | 0   | 0    | 0    | 41  | 0.002 | 9    | 34  | 1.344 | 9    |
|                    | 1.6 | 3.89 | 60.4 | 0.83 | 0.29 | 9.58 |     |      |      |     |      |      | 0.8 |       | 58.0 | 0.7 |       | 43.8 |
| Rhynchota ad ter   | 81  | 5    | 62   | 8    | 4    | 9    | 0   | 0    | 0    | 0   | 0    | 0    | 65  | 3.428 | 11   | 56  | 2.878 | 60   |
|                    |     |      |      |      |      |      |     |      |      |     |      |      | 0.3 |       | 1.72 | 0.5 |       | 4.57 |
| Rhynchota ne aq    | 0   | 0    | 0    | 0    | 0    | 0    | 0   | 0    | 0    | 0   | 0    | 0    | 30  | 0.148 | 1    | 16  | 0.242 | 0    |
|                    |     |      |      |      |      |      |     |      |      |     |      |      | 0.0 |       | 0.09 |     |       |      |
| Rhynchota ny ter   | 0   | 0    | 0    | 0    | 0    | 0    | 0   | 0    | 0    | 0   | 0    | 0    | 41  | 0.067 | 7    | 0   | 0     | 0    |
| Salamandridae      | 6.8 | 2.07 | 203. | 0.16 | 0.07 | 0.41 | 1.5 | 3.38 | 85.3 | 0.2 | 1.06 | 5.60 | 4.7 |       | 209. | 0.8 |       | 21.5 |
| eggs               | 28  | 1    | 698  | 8    | 8    | 6    | 90  | 7    | 33   | 41  | 1    | 1    | 38  | 5.386 | 791  | 94  | 1.031 | 66   |
|                    |     |      |      |      |      |      |     |      |      |     |      |      | 0.0 |       | 0.37 | 0.0 |       | 0.31 |
| Scorpiones         | 0   | 0    | 0    | 0    | 0    | 0    | 0   | 0    | 0    | 0   | 0    | 0    | 41  | 0.374 | 4    | 34  | 0.326 | 0    |
|                    | 0.1 | 0.00 | 0.12 | 0.16 | 0.00 | 0.29 |     |      |      | 0.0 | 0.00 | 0.04 |     |       |      | 0.0 |       | 0.12 |
| Thysanoptera       | 05  | 1    | 8    | 75   | 3    | 0    | 0   | 0    | 0    | 34  | 3    | 0    | 0   | 0     | 0    | 69  | 0.001 | 0    |
|                    |     |      |      |      |      |      | 0.0 | 1.84 | 2.70 |     |      |      | 0.0 |       | 0.50 |     |       |      |
| Trichoptera l      | 0   | 0    | 0    | 0    | 0    | 0    | 47  | 3    | 0    | 0   | 0    | 0    | 41  | 0.523 | 8    | 0   | 0     | 0    |
|                    | 0.2 | 0.08 |      | 0.17 | 0.13 |      | 0.0 | 0.37 |      | 0.0 | 0.23 |      | 0.0 |       |      | 0.0 |       |      |
| B'                 | 02  | 1    |      | 7    | 5    |      | 31  | 1    |      | 50  | 7    |      | 56  | 0.227 |      | 84  | 0.266 |      |
|                    |     | 7642 |      |      | 2603 |      | 213 | 3924 |      | 290 | 2840 |      | 242 | 1384  |      | 290 | 1588  |      |
| Total prey         | 952 | .400 |      | 597  | .583 |      | 8   | .532 |      | 7   | .467 |      | 7   | 3.652 |      | 9   | 5.666 |      |
|                    | 91. | 81.7 |      | 90.4 | 88.2 |      | 99. | 84.0 |      | 99. | 98.4 |      | 94. | 84.79 |      | 95. | 70.44 |      |
| % Aquatic prey     | 290 | 54   |      | 41   | 8    |      | 486 | 74   |      | 62  | 8    |      | 108 | 8     |      | 462 | 2     |      |
