# Supplementary material
Source: MDPI journal article supplement (https://www.mdpi.com/1424-2818/13/1/32)
Supplement: s1 [file s1]

**Table S2.** SIMPER analysis of prey ingested by *Lissotriton italicus* (LI), *L. vulgaris* (LV) and *Triturus carnifex* (TC). Overall average percentage dissimilarity of diet composition among species (Av Diss), percentage of contribution to dissimilarity (Cont), cumulative percentage of contribution dissimilarity (Cumul), mean abundance of prey in each species (Mean), are shown. Abbreviations: ad = adults; aq = aquatic; l = larvae; ne = neanids; ny = nymphs; pu = pupae; ter = terrestrial.

| Taxon              | Av Diss | Cont   | Cumul | Mean LI | Mean LV | Mean TC |
|--------------------|---------|--------|-------|---------|---------|---------|
| Cladocera          | 9.530   | 13.540 | 13.54 | 0.352   | 0.752   | 0.365   |
| Diptera l          | 8.542   | 12.140 | 25.69 | 0.648   | 0.604   | 0.660   |
| Ostracoda          | 7.983   | 11.350 | 37.03 | 0.36    | 0.470   | 0.315   |
| Diptera pu         | 6.928   | 9.847  | 46.88 | 0.376   | 0.195   | 0.385   |
| Amphipoda          | 5.670   | 8.059  | 54.94 | 0.304   | 0.221   | 0.155   |
| Salamandridae eggs | 3.927   | 5.582  | 60.52 | 0.152   | 0.101   | 0.170   |
| Coleoptera ad ter  | 2.967   | 4.218  | 64.74 | 0.128   | 0.040   | 0.170   |
| Isopoda aq         | 2.685   | 3.817  | 68.55 | 0.120   | 0.060   | 0.055   |
| Diptera            | 2.348   | 3.338  | 71.89 | 0.160   | 0.013   | 0.100   |
| Gastropoda         | 2.348   | 3.337  | 75.23 | 0.008   | 0.047   | 0.185   |
| Ephemeroptera l    | 2.336   | 3.321  | 78.55 | 0.088   | 0.054   | 0.110   |
| Rhynchota ad ter   | 2.057   | 2.923  | 81.47 | 0.112   | 0       | 0.135   |
| Formicidae         | 1.811   | 2.574  | 84.05 | 0.096   | 0.007   | 0.115   |
| Araneae            | 1.610   | 2.289  | 86.33 | 0.080   | 0.013   | 0.080   |
| Coleoptera l aq    | 1.342   | 1.907  | 88.24 | 0.096   | 0.007   | 0.040   |
| Odonata l          | 1.280   | 1.819  | 90.06 | 0.064   | 0.013   | 0.065   |
| Hymenoptera        | 0.805   | 1.145  | 91.21 | 0.056   | 0.007   | 0.035   |
| Bivalvia           | 0.699   | 0.993  | 92.20 | 0.016   | 0.013   | 0.045   |
| Lepidoptera l      | 0.581   | 0.826  | 93.03 | 0       | 0.007   | 0.045   |
| Coleoptera ad aq   | 0.554   | 0.788  | 93.81 | 0.024   | 0.013   | 0.020   |
| Rhynchota ne aq    | 0.494   | 0.703  | 94.52 | 0       | 0       | 0.055   |
| Blattodea          | 0.426   | 0.606  | 95.12 | 0.008   | 0       | 0.035   |
| Diplopoda          | 0.388   | 0.552  | 95.67 | 0       | 0       | 0.035   |
| Acarina            | 0.351   | 0.499  | 96.17 | 0.016   | 0.007   | 0.015   |
| Crustacea          | 0.305   | 0.434  | 96.61 | 0.016   | 0       | 0.010   |
| Haplotaxida        | 0.279   | 0.397  | 97.00 | 0.008   | 0.007   | 0.010   |
| Collembola         | 0.270   | 0.383  | 97.39 | 0.016   | 0.007   | 0.010   |
| Orthoptera         | 0.267   | 0.379  | 97.77 | 0.024   | 0       | 0.010   |
| Thysanoptera       | 0.256   | 0.364  | 98.13 | 0.016   | 0.007   | 0.010   |
| Coleoptera l ter   | 0.194   | 0.276  | 98.41 | 0       | 0       | 0.020   |
| Rhynchota ad aq    | 0.192   | 0.273  | 98.68 | 0.008   | 0       | 0.010   |
| Isoptera           | 0.158   | 0.224  | 98.90 | 0.008   | 0.007   | 0       |
| Isopoda ter        | 0.156   | 0.222  | 99.13 | 0       | 0       | 0.015   |
| Scorpiones         | 0.146   | 0.208  | 99.33 | 0       | 0       | 0.010   |

|                   |       |       |       |       |       |       |
|-------------------|-------|-------|-------|-------|-------|-------|
| Trichoptera I     | 0.138 | 0.196 | 99.53 | 0     | 0.007 | 0.005 |
| Odonata           | 0.104 | 0.147 | 99.68 | 0     | 0     | 0.010 |
| Acanthocephala    | 0.066 | 0.093 | 99.77 | 0     | 0     | 0.005 |
| Dermaptera        | 0.060 | 0.086 | 99.86 | 0.008 | 0     | 0     |
| Pseudoscorpionida | 0.053 | 0.076 | 99.93 | 0.008 | 0     | 0     |
| Rhynchota ny ter  | 0.048 | 0.068 | 100   | 0     | 0     | 0.005 |
| Nematoda          | 0     | 0     | 100   | 0     | 0     | 0     |

---
